# Supplementary material for: H2 Production from Formic Acid Using Highly Stable Carbon-Supported Pd-Based Catalysts Derived from Soft-Biomass Residues: Effect of Heat Treatment and Functionalization of the Carbon Support
Source: MDPI journal article supplement (doi:10.3390/ma14216506), 2021-10-29
Supplement: s1 [file s1]

*Supplementary Materials*

# **H<sub>2</sub> Production from Formic Acid Using Highly Stable Carbon-Supported Pd-Based Catalysts Derived from Soft-Biomass Residues: Effect of Heat Treatment and Functionalization of the Carbon Support**

Jessica Alejandra Chaparro-Garnica <sup>1</sup>, Miriam Navlani-García <sup>1</sup>, David Salinas-Torres <sup>2</sup>, Emilia Morallón <sup>2</sup> and Diego Cazorla-Amorós <sup>1,\*</sup>

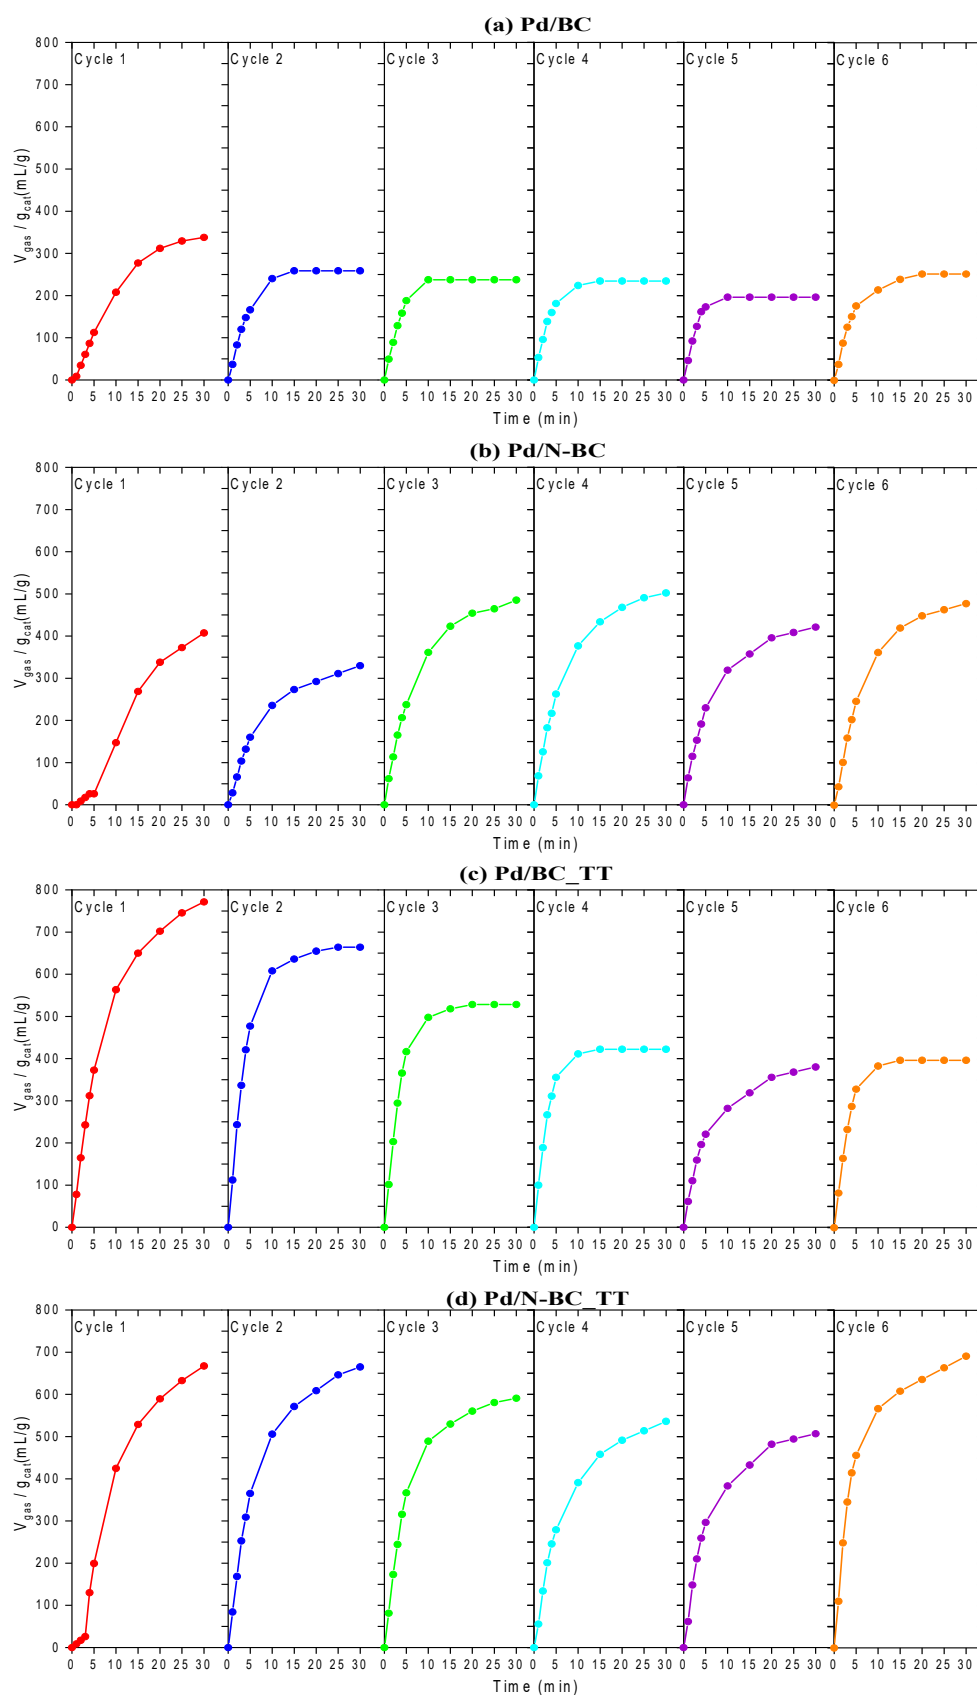

**Figure S1.** Gas evolution profiles ( $\text{H}_2 + \text{CO}_2$ ) achieved for the all cycles for: (a) Pd/BC, (b) Pd/N-BC, (c) Pd/BC\_TT, and (d) Pd/N-BC\_TT.

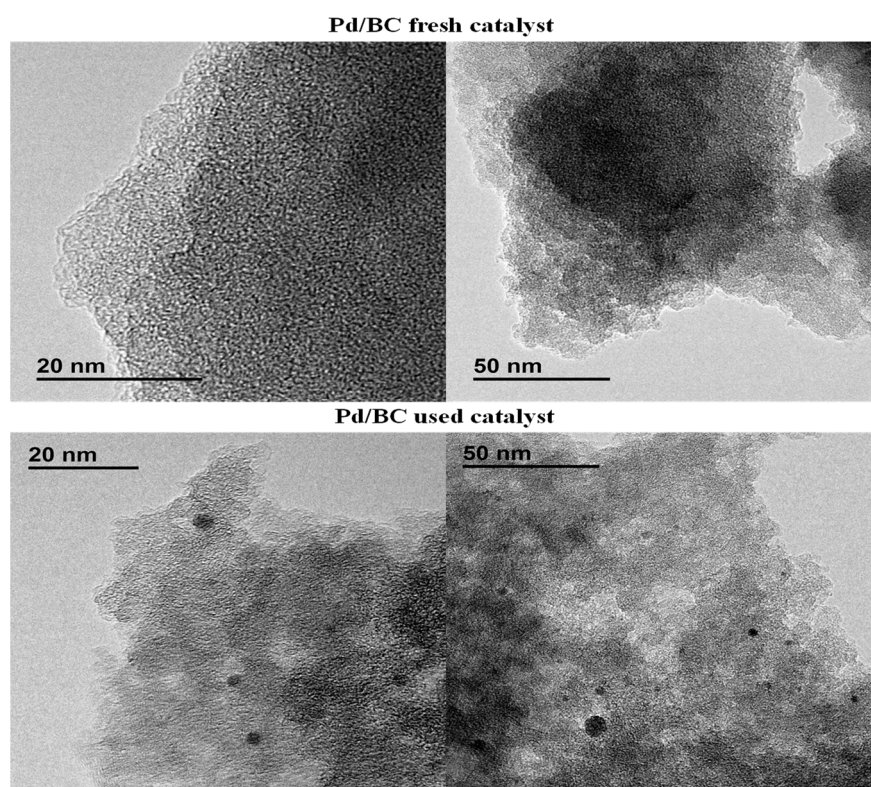

**Figure S2.** TEM micrographs for Pd/BC catalyst fresh and used after 6 cycles.

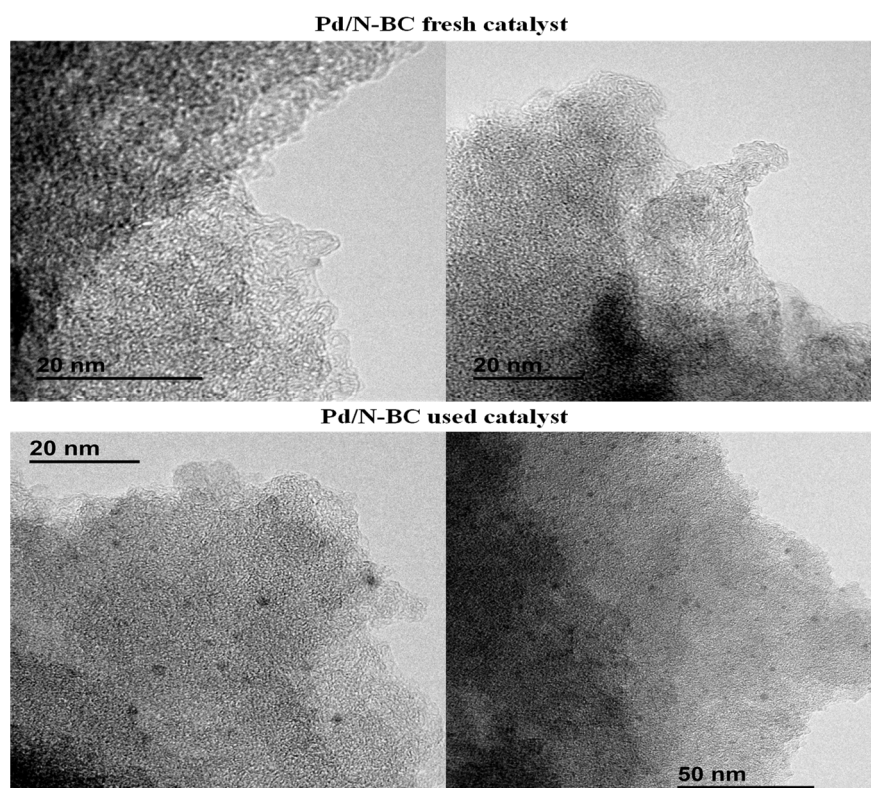

**Figure S3.** TEM micrographs for Pd/N-BC catalyst fresh and used after 6 cycles.

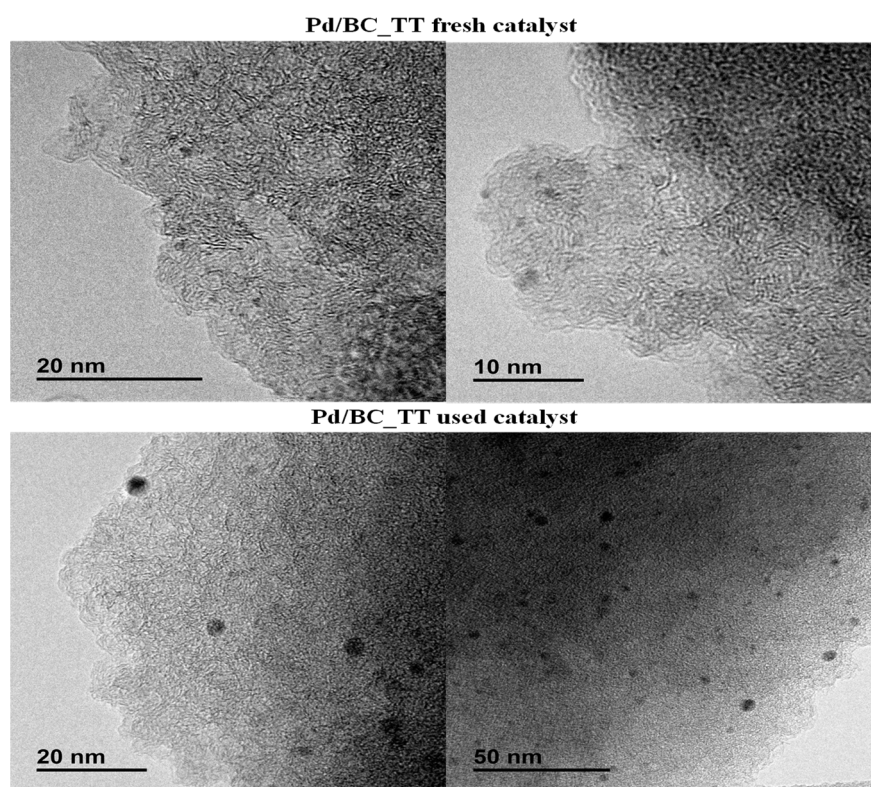

**Figure S4.** TEM micrographs for Pd/BC\_TT catalyst fresh and used after 6 cycles.

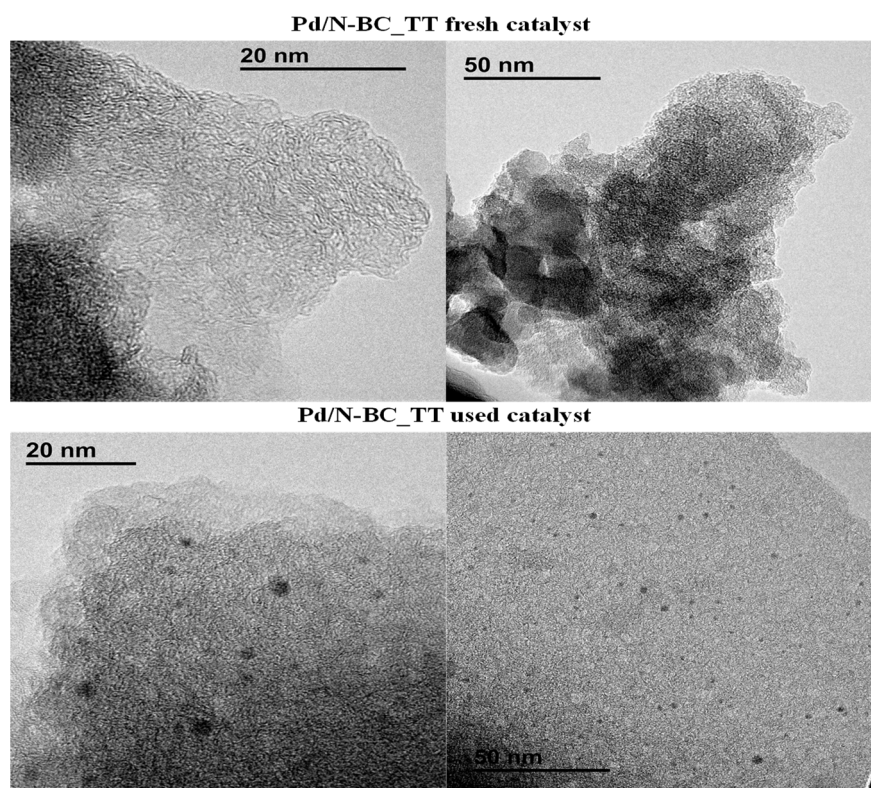

**Figure S5.** TEM micrographs for Pd/N-BC\_TT catalyst fresh and used after 6 cycles.

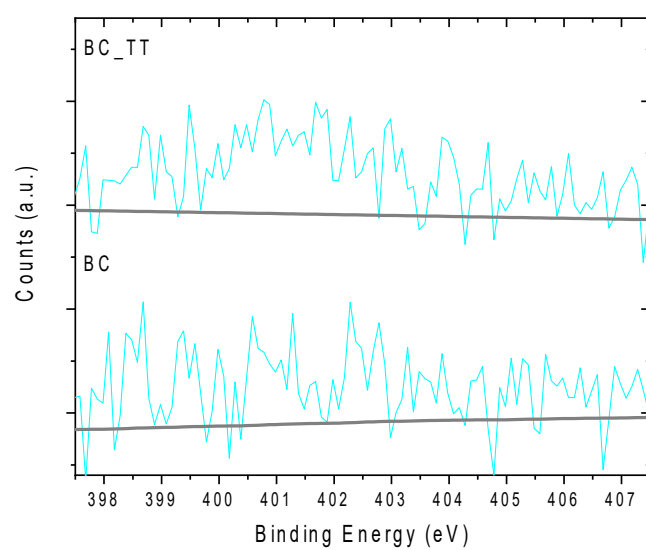

**Figure S6.** XPS N1s spectra of the BC and BC\_TT.
